# Supplementary material for: Novel perylene diimide-based polymers with electron-deficient segments as the comonomer for efficient all-polymer solar cells
Source: Royal Society of Chemistry journal article supplement (doi:10.1039/c7ta09930d), 2017-12-04
Supplement: c7ta09930d1.pdf [file c7ta09930d1.pdf]

## **Supporting Information for**

### **Novel Perylenediimide-Based Polymers with Electron-Deficient**

### **Segment as the Comonomer for Efficient All-Polymer Solar Cells**

Ming Liu,<sup>a#</sup> Jing Yang,<sup>b#</sup> Yuli Yin,<sup>a</sup> Yong Zhang,<sup>a\*</sup> Erjun Zhou,<sup>b\*</sup> Fengyun Guo,<sup>a</sup> Liancheng Zhao<sup>a</sup>

<sup>a</sup>School of Materials Science and Engineering, Harbin Institute of Technology, Harbin 150001, China

<sup>b</sup>CAS Key Laboratory of Nanosystem and Hierarchical Fabrication, CAS Center for Excellence in Nanoscience, National Center for Nanoscience and Technology, Beijing 100190, China

#Both authors contribute equally.

\*E-mail: [yongzhang@hit.edu.cn](mailto:yongzhang@hit.edu.cn); [zhouej@nanoctr.cn](mailto:zhouej@nanoctr.cn)

**Characterization.**  $^1\text{H}$  NMR spectra were recorded on a Bruker AV400 NMR spectrometer and used tetramethylsilane (TMS) as an internal standard in  $\text{CDCl}_3$ . The molecular weight was determined by GPC using THF as the eluent and monodispersed polystyrene as the standard. The UV-Vis spectra of polymers were measured on with a TU-1601 spectrophotometer by using a 1 cm glass cuvette. Cyclic voltammetry (CV) was performed in 0.1M tetrabutylammonium hexafluorophosphate in acetonitrile at a scan rate of 100 mV/s with ITO as the working electrode, Pt wire as the counter electrode and  $\text{Ag}/\text{Ag}^+$  as the reference electrode. Atomic force microscopy (AFM) images were obtained using a NanoMan VS microscope in the tapping mode. The thickness of the active layer of the device was measured via a VeecoDektak 150 surface profiler.

**All-polymer solar cell fabrication.** The detailed fabrication is listed in Supporting Information. A patterned ITO was pre-cleaned by detergent, deionized water, acetone and 2-propanol for 15 min, respectively, under ultrasonic condition. The cleaned ITO was then treated by UV oxygen to form the hydrophilic surface. The PEDOT:PSS solution was spin-coated on the ITO at 3500 rpm for 30s and dried over 150 °C for 15 min under air. The PTB7-Th:polymer acceptor solution (optimized weight ratio of 1:1) in chlorobenzene with different amount solvent additives was then spin-coated above PEDOT:PSS layer at a total concentration of 20 mg/mL within glove box. The Ca (20 nm) and Al (80 nm) cathode were evaporated onto the active layer under a pressure of below  $10^{-6}$  bar with an active area of 4 mm<sup>2</sup>. The current density-voltage curves were collected by a Keithley 2420 under Oriel Newport 150W solar simulator (AM 1.5G).

The EQEs were measured by an Oriel Newport System. All above measurements were done at room temperature.

The hole-only device for the hole mobility was fabricated with a device structure of ITO/PEDOT:PSS/PTB7-Th:polymer acceptor/Au. The electron-only device for the electron mobility was fabricated with a device structure of ITO/TiO<sub>x</sub>/PTB7-Th:polymer acceptor/Al. Both the hole and electron mobilities by space charge limited current (SCLC) were calculated with the following Mott-Gurney equation in the SCLC region:  $J = (9/8)\epsilon_0\epsilon_r\mu(V^2/L^3)$ , in which  $\epsilon_0$  is the permittivity of the vacuum,  $\epsilon_r$  is the dielectric constant of the polymer and assumed to be 3, and  $L$  is the thickness of active layer.

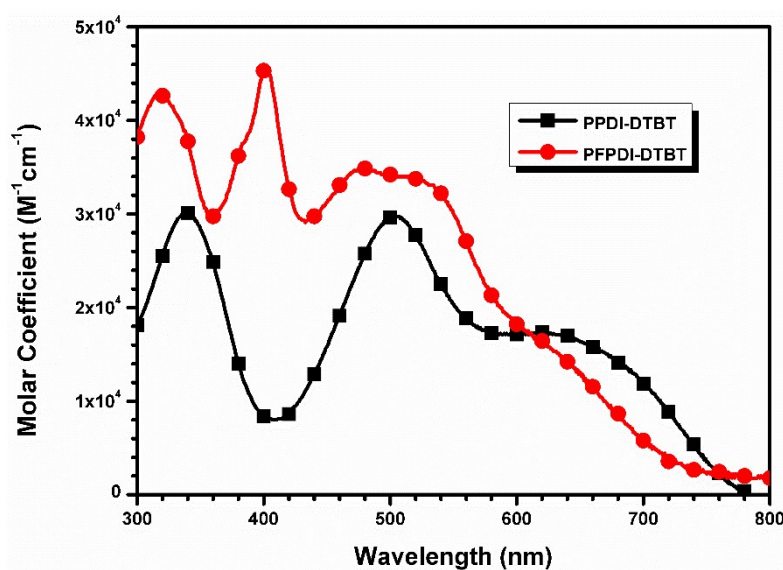

**Figure S1.** The molar coefficient of PPDI-DTBT and PFPDI-DTBT in chlorobenzene solution.

**Table S1.** Photovoltaic performance parameters of the all-PSCs based on PTB7-Th: PPDI-DTBT (or FPPDI-DTBT) with various blend weight ratios, under the annealing temperature of 120 °C.

| Acceptor   | D/A Ratio | $V_{oc}$ (V) | $J_{sc}$ (mA cm <sup>-2</sup> ) | FF   | PCE (%) |
|------------|-----------|--------------|---------------------------------|------|---------|
| PPDI-DTBT  | 1.5:1     | 0.77         | 10.09                           | 0.43 | 3.34    |
|            | 1:1       | 0.78         | 10.43                           | 0.44 | 3.58    |
|            | 1:1.5     | 0.79         | 9.70                            | 0.44 | 3.37    |
| PFPDI-DTBT | 1.5:1     | 0.75         | 12.23                           | 0.52 | 4.77    |
|            | 1:1       | 0.76         | 12.48                           | 0.56 | 5.31    |
|            | 1:1.5     | 0.76         | 12.03                           | 0.55 | 5.03    |

**Table S2.** Photovoltaic performance parameters of the all-PSCs based on PTB7-Th: PPDI-DTBT (or PFPDI-DTBT) with different solvent additives, under the annealing temperature of 120 °C.

| Acceptor   | Additive | $V_{oc}$ (V) | $J_{sc}$ (mA cm <sup>-2</sup> ) | FF   | PCE (%) |
|------------|----------|--------------|---------------------------------|------|---------|
| PPDI-DTBT  | no       | 0.78         | 10.43                           | 0.44 | 3.58    |
|            | 1%DIO    | 0.78         | 9.10                            | 0.50 | 3.55    |
|            | 1%DPE    | 0.79         | 8.94                            | 0.48 | 3.39    |
|            | 0.5%CN   | 0.78         | 10.59                           | 0.46 | 3.80    |
|            | 1%CN     | 0.78         | 9.79                            | 0.50 | 3.82    |
|            | 3%CN     | 0.78         | 10.65                           | 0.49 | 4.07    |
|            | 4%CN     | 0.78         | 10.50                           | 0.47 | 3.85    |
| PFPDI-DTBT | no       | 0.76         | 12.48                           | 0.56 | 5.31    |
|            | 1%DPE    | 0.76         | 9.63                            | 0.62 | 4.54    |
|            | 1%CN     | 0.76         | 11.80                           | 0.63 | 5.65    |
|            | 0.5%DIO  | 0.76         | 13.62                           | 0.60 | 6.21    |
|            | 1%DIO    | 0.76         | 13.25                           | 0.60 | 6.04    |
|            | 3%DIO    | 0.76         | 10.02                           | 0.55 | 4.19    |

**Table S3.** Photovoltaic performance parameters of the all-PSCs based on PTB7-Th: PPDI-DTBT (or PFPDI-DTBT) with different annealing temperature.

| Acceptor   | Additive | T(°C) | V <sub>oc</sub> (V) | J <sub>sc</sub> (mA cm <sup>-2</sup> ) | FF   | PCE (%) |
|------------|----------|-------|---------------------|----------------------------------------|------|---------|
| PPDI-DTBT  | 3%CN     | 80    | 0.77                | 10.71                                  | 0.45 | 3.71    |
|            |          | 100   | 0.78                | 10.58                                  | 0.47 | 3.88    |
|            |          | 120   | 0.78                | 10.65                                  | 0.49 | 4.07    |
|            |          | 140   | 0.78                | 10.20                                  | 0.48 | 3.82    |
|            |          | 160   | 0.77                | 9.59                                   | 0.44 | 3.25    |
| PFPDI-DTBT | 0.5%DIO  | 80    | 0.75                | 13.19                                  | 0.54 | 5.34    |
|            |          | 100   | 0.75                | 14.05                                  | 0.54 | 5.69    |
|            |          | 120   | 0.76                | 13.62                                  | 0.60 | 6.21    |
|            |          | 140   | 0.76                | 14.13                                  | 0.58 | 6.23    |
|            |          | 160   | 0.75                | 13.76                                  | 0.59 | 6.09    |

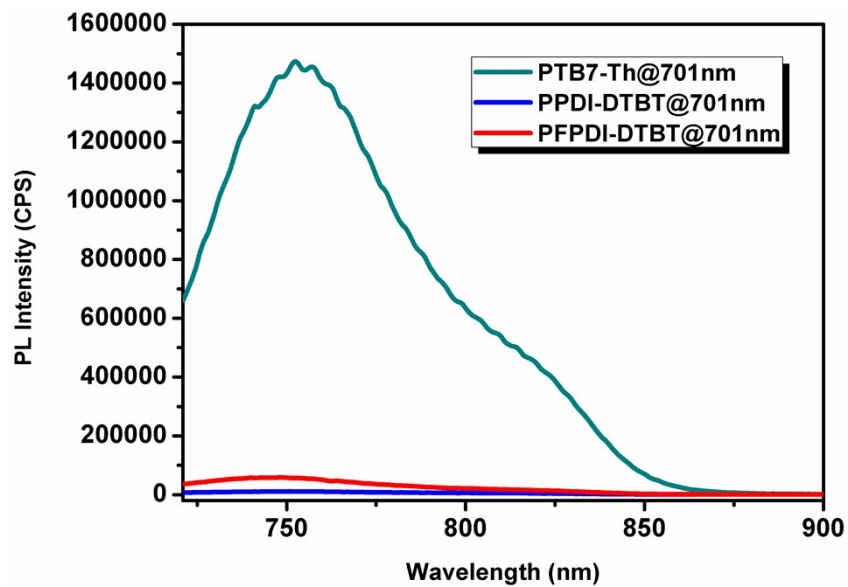

**Figure S2.** The PL spectra of PTB7-Th, PTB7-Th:PPDI-DTBT and PTB7-Th:PFPDI-DTBT films excited at 701nm.
